# Supplementary material
Source: publisher figshare collection journal article supplement (https://acs.figshare.com/ndownloader/files/8340155)
Supplement: Supplementary file 1 [file 8340155]

## Supporting Information

### High and Stable Ionic Conductivity in 2D Nanofluidic Ion Channels between Boron Nitride Layers

*Si Qin<sup>1</sup>, Dan Liu<sup>1</sup>, Guang Wang<sup>1</sup>, David Portehault<sup>2</sup>, Christopher J. Garvey<sup>3</sup>, Yury Gogotsi<sup>4</sup>, Weiwei Lei<sup>1\*</sup> and Ying Chen<sup>1\*</sup>*

1. Institute for Frontier Materials, Deakin University

75 Pigdons Road, Waurn Ponds, Victoria 3216, Australia

E-mail: [weiwei.lei@deakin.edu.au](mailto:weiwei.lei@deakin.edu.au); [ian.chen@deakin.edu.au](mailto:ian.chen@deakin.edu.au)

2. Sorbonne Universités, UPMC Université Paris 06, CNRS, Collège de France, Laboratoire de Chimie de la Matière Condensée de Paris (LCMCP), 11 place Marcelin Berthelot, F-75005 Paris, France
3. Australia Nuclear Science and Technology Organization, Sydney, New South Wales 2232, Australia
4. A. J. Drexel Nanomaterials Institute and Materials Science and Engineering Department, Drexel University 3141 Chestnut Street, Philadelphia, Pennsylvania 19104, United States

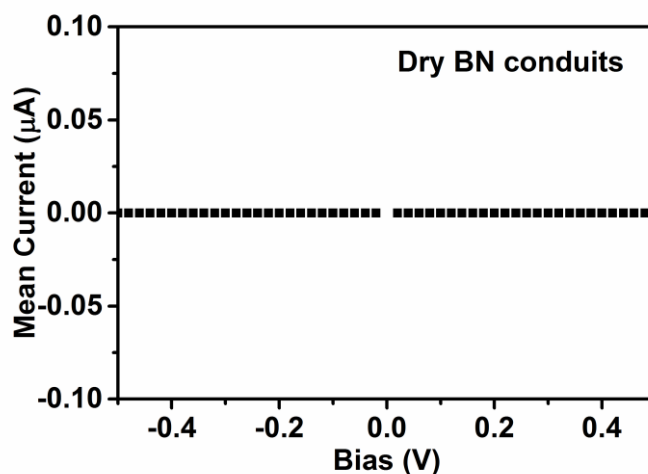

**Figure S1.** *I*–*V* curves obtained on dry BN conduits. There was no meaningful current recorded, indicating that the dry conduits is not conductive within the voltage range of -0.5 – 0.5 V.

The SEM images of two BN conduits with different thicknesses and their corresponding *I*–*V* curves are shown in Figure S2 (a–d). The two conduits have similar size with a length and width around 14 mm and 6 mm respectively. Conductance of the two conduits are shown in Figure S2 (e–f), suggesting the thicker conduits have a larger conductance and the conductance is proportional to the thickness. However, the conductivities of the two conduits are still highly consistent in the NaCl concentration range ( $10^{-6}$ –0.05 M).

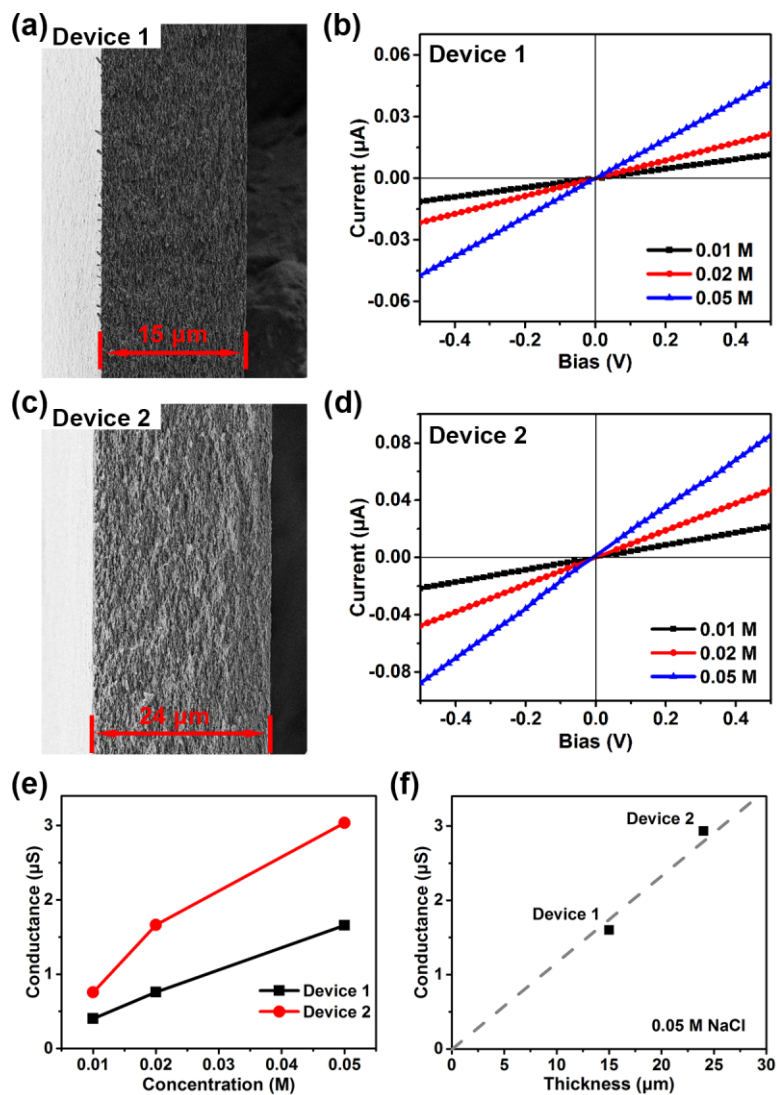

**Figure S2.** BN conduits with different thicknesses, the corresponding  $I$ - $V$  curves and the conductance obtained in NaCl concentrations of 0.01, 0.02 and 0.05 M at a pH  $\sim 7$ . (a) SEM image of BN conduits with a thickness of  $\sim 15 \mu\text{m}$  and (b) its corresponding  $I$ - $V$  curve. (c) SEM image of BN conduits with a thickness of  $\sim 24 \mu\text{m}$  and (d) its corresponding  $I$ - $V$  curve. (e) Conductance of the two different conduit devices and (f) plot of their conductance as a function of thickness.

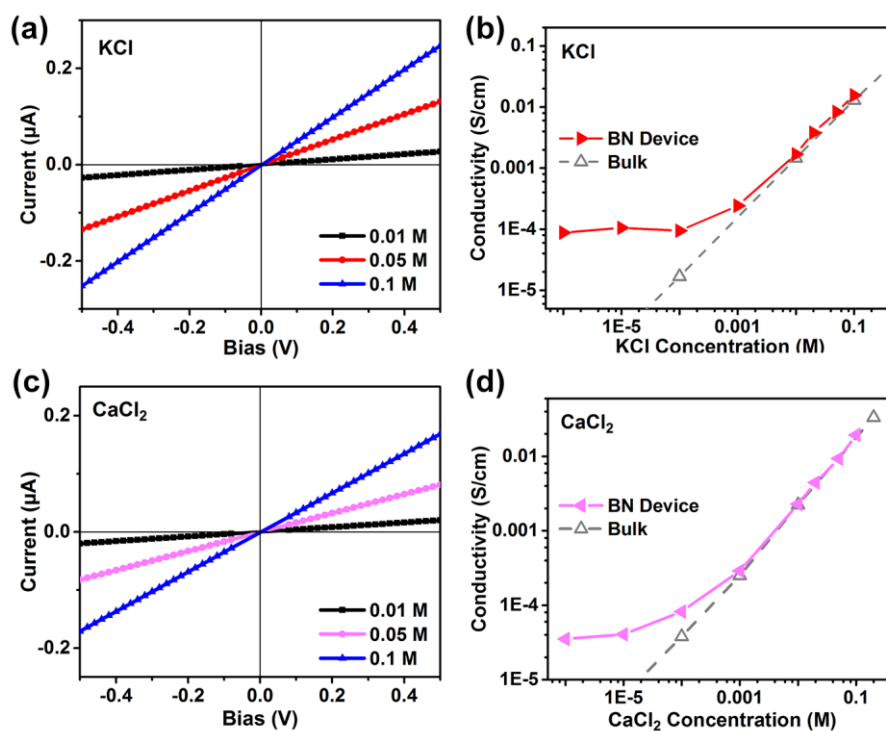

**Figure S3.** (a)  $I-V$  curves obtained at KCl concentrations of 0.01, 0.05 and 0.1 M. (b) Ionic conductivity as a function of KCl concentration with pH  $\sim 7$ . (c)  $I-V$  curves obtained at  $CaCl_2$  concentrations of 0.01, 0.05 and 0.1 M. (d) Ionic conductivity as a function of  $CaCl_2$  concentration with pH  $\sim 7$ .

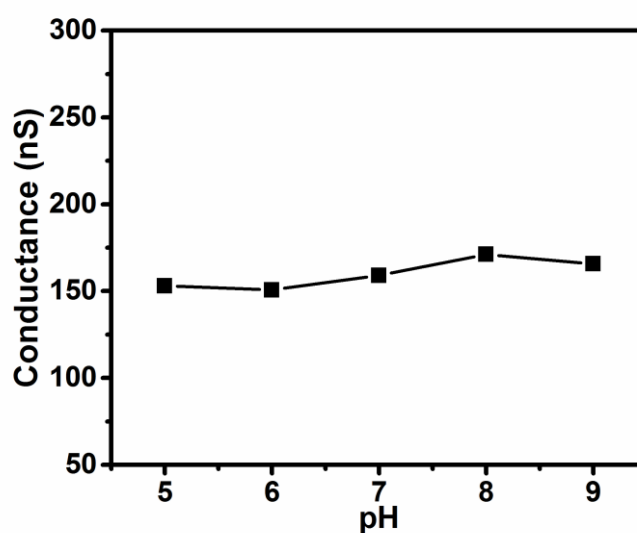

**Figure S4.** Conductance measured in 0.1 M KCl with different pH from 5 to 9. No clear dependence of conductance on pH has been found.

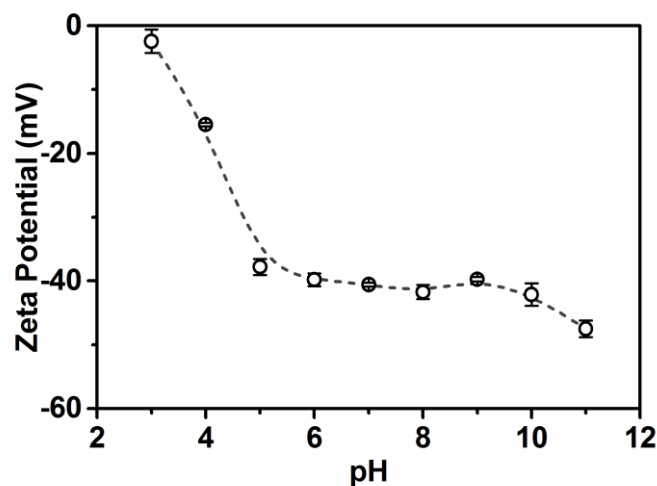

**Figure S5.** Zeta potential of the BN nanosheets in colloidal dispersion in a pH range of 3–11 in 1 mM KCl electrolyte.

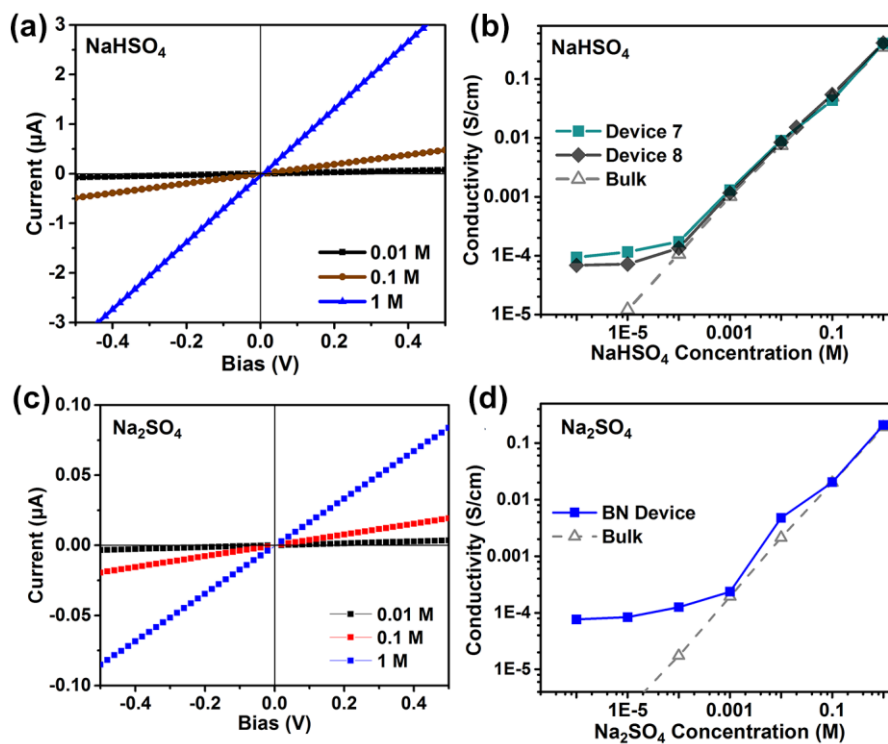

**Figure S6.** The results from  $\text{Na}_2\text{SO}_4$  and  $\text{NaHSO}_4$  solutions show differences in conductivity with the presence of protons. (a)  $I$ – $V$  curves obtained at  $\text{NaHSO}_4$  concentrations of 0.01, 0.1 and 1 M. (b) Ionic conductivity as a function of  $\text{NaHSO}_4$  concentration. (c)  $I$ – $V$  curves obtained at  $\text{Na}_2\text{SO}_4$  concentrations of 0.01, 0.1 and 1 M. (d) Ionic conductivity as a function of  $\text{Na}_2\text{SO}_4$  concentration.

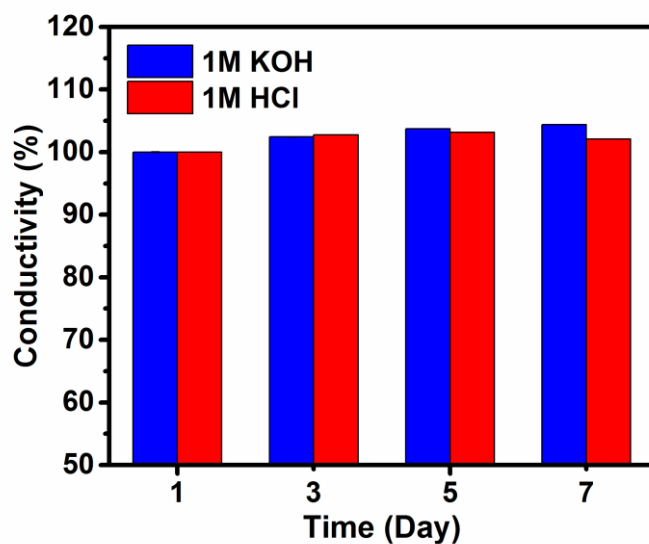

**Figure S7.** Variation of ionic conductivity of the BN conduits in 1 week measured in 1 M KOH and 1 M HCl.

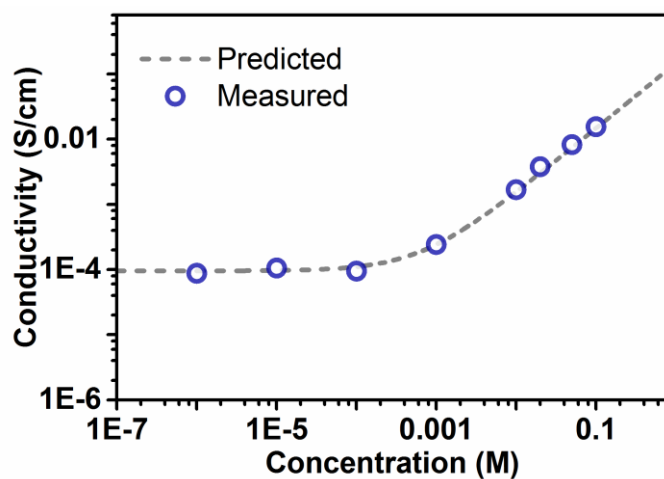

**Figure S8.** Conductivity predicted from equation (1) and the conductivity measured in KCl solutions at various concentrations.
